# Supplementary material for: Detection of O 4 absorption around 328 and 419 nm in measured atmospheric absorption spectra
Source: Copernicus journal article supplement (doi:10.5194/acp-18-1671-2018), 2018-02-06
Supplement: Supplementary file 1 [file acp-18-1671-2018-supplement.zip]

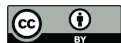

## *Supplement of*

# **Detection of O<sub>4</sub> absorption around 328 and 419 nm in measured atmospheric absorption spectra**

**J. Lampel et al.**

*Correspondence to:* Johannes Lampel ([johannes.lampel@iup.uni-heidelberg.de](mailto:johannes.lampel@iup.uni-heidelberg.de))

- [acp-18-1671-2018-supplement-title-page.pdf](#)
- [O4\\_thalman\\_293K\\_v4\\_328\\_merged\\_acp.txt](#)

The copyright of individual parts of the supplement might differ from the CC BY 4.0 License.
